# Supplementary material for: New Cassane Diterpenoids from <em>Caesalpinia sappan</em> and Their Antiplasmodial Activity
Source: Preprints.org preprint supplement (doi:10.20944/preprints201710.0088.v1), 2017-10-13

# New cassane diterpenoids from *Caesalpinia sappan* and their antiplasmodial activity

Nai-Liang Zhu <sup>1,†</sup>, Zhong-Hao Sun <sup>1,†</sup>, Mei-Geng Hu <sup>1</sup>, Tong-Yu Wu <sup>2</sup>, Jing-Quan Yuan <sup>3</sup>,  
Hai-Feng Wu <sup>1</sup>, Yu Tian <sup>1</sup>, Peng-Fei Li <sup>1</sup>, Jun-Shan Yang <sup>1</sup>, Guo-Xu Ma <sup>1,\*</sup>, Xu-Dong Xu <sup>1,\*</sup>

<sup>1</sup> *Key Laboratory of Bioactive Substances and Resource Utilization of Chinese Herbal Medicine, Ministry of Education, Beijing Key Laboratory of Innovative Drug Discovery of Traditional Chinese Medicine (Natural Medicine) and Translational Medicine, Key Laboratory of Efficacy Evaluation of Chinese Medicine against Glycolipid Metabolic Disorders, State Administration of Traditional Chinese Medicine, Institute of Medicinal Plant Development, Peking Union Medical College and Chinese Academy of Medical Sciences, Beijing 100193, China*

<sup>2</sup> *Center of Research and Development on Life Sciences and Environment Sciences, Harbin University of Commerce, Harbin 150076, China*

<sup>3</sup> *College of chemistry and materials science, Guangxi Teachers Education University, Nanning 530001, China*

---

\* Corresponding author. Tel./fax: + 86 010 57833296.

E-mail address: mgxfl8785@163.com (G. Ma), xdxu@implad.ac.cn (X. D. Xu)

<sup>†</sup>These authors contributed equally to this work.

**Abstract:** One new cassane diterpene possessing unusual *N* bridge between C-19 and C-20 named caesalsappanin R (**1**) together with another new diterpene caesalsappanin S (**2**) were isolated from the seeds of *Caesalpinia sappan* with methanol extract. Their structures were determined by spectroscopic analysis and examined alongside existing data from prior studies. Their biological activities were profiled by the antiplasmodial.

**Keywords:** *Caesalpinia sappan*; cassane diterpenes; *N* bridge; antiplasmodial activity

## 1. The plausible biosynthetic pathway of Compound **1**

The key intermediate product **3** was produced from the precursor of geranylgeranyl pyrophosphate (GGPP) by an intramolecular cyclization, followed by oxidation, dehydration, and dehydrogenation reaction. Intermediate product **4** was proposed to be generated from **3** through the amination and hydrogenation reactions with the participation of  $\beta$ -aminoethanol. A plausible biosynthetic pathway to caesalпамide A (**1**) was proposed in detail (Scheme 1).

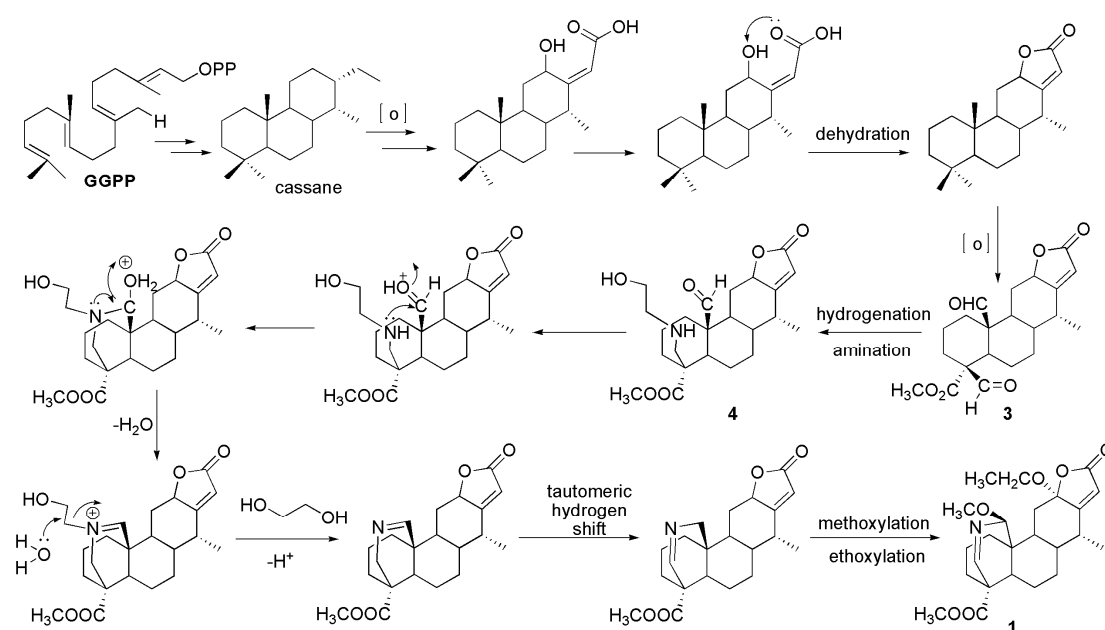

**Scheme 1.** Plausible biosynthesis pathway of **1**

Figure S1.  $^1\text{H}$ -NMR (600 MHz,  $\text{CDCl}_3$ ) spectrum of the new compound **1**

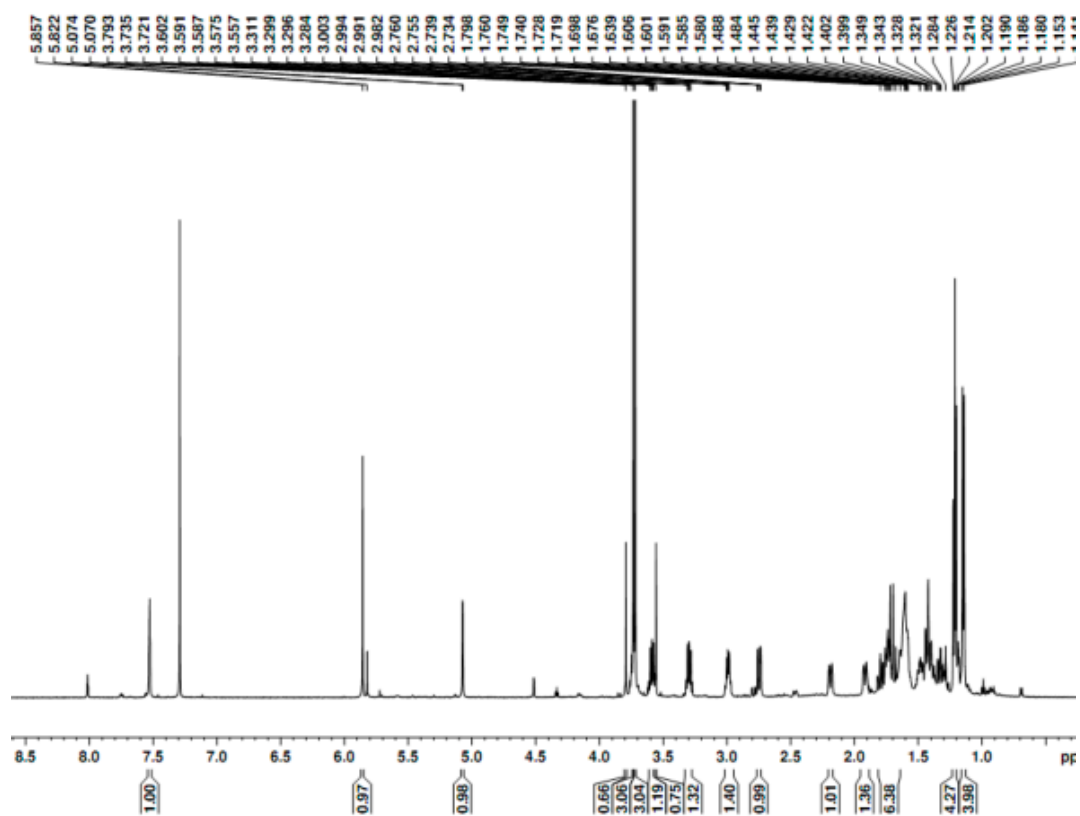

Figure S2.  $^{13}\text{C}$ -APT (150 MHz,  $\text{CDCl}_3$ ) spectrum of the new compound **1**

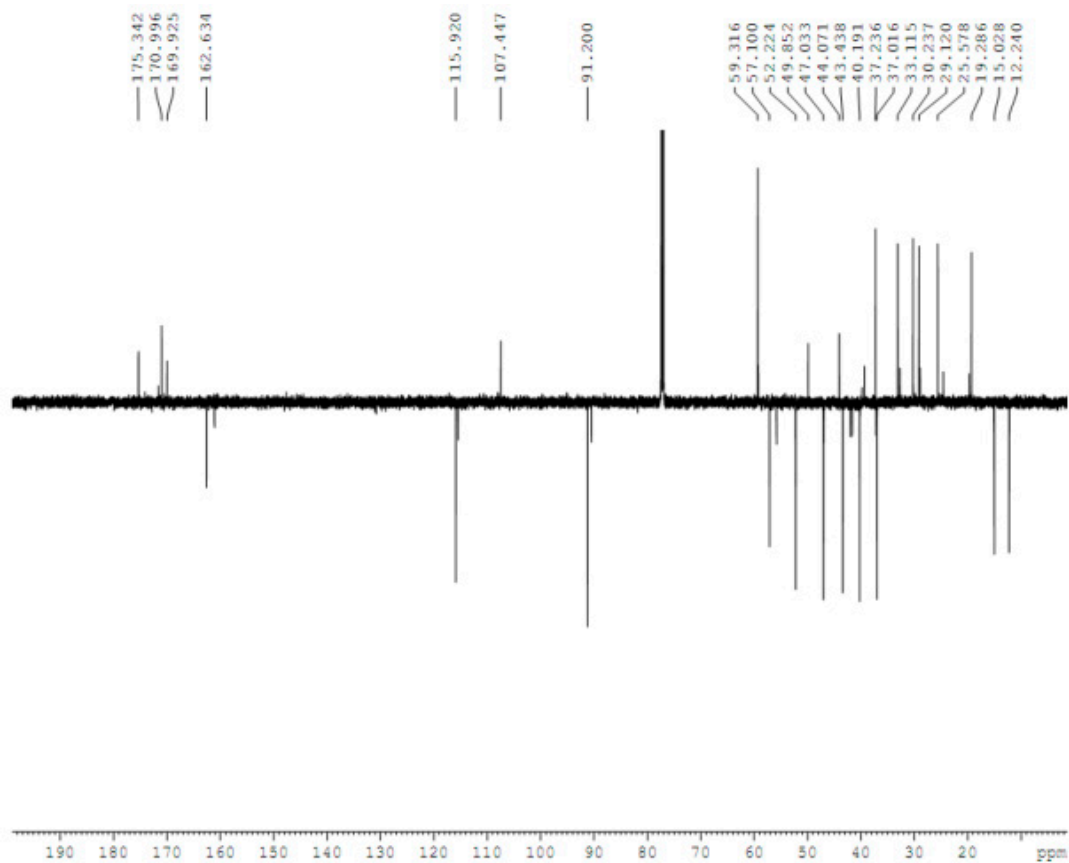

Figure S3. HSQC spectrum of the new compound **1**

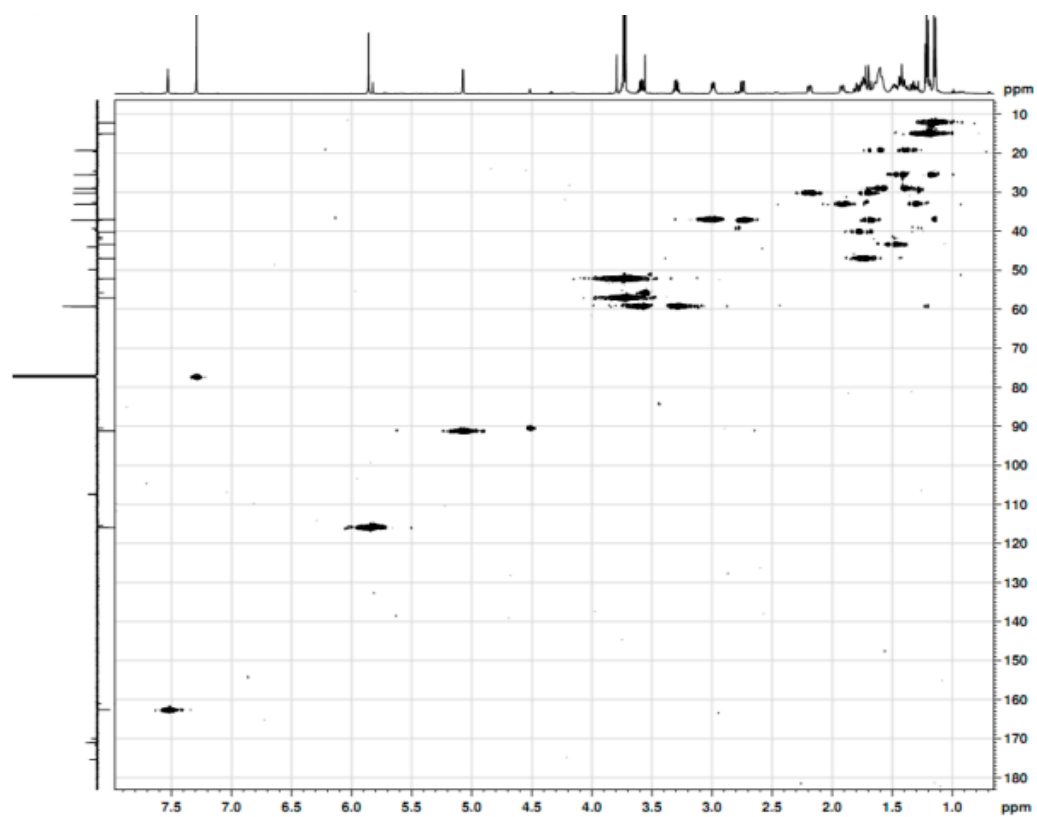

Figure S4. HMBC spectrum of the new compound **1**

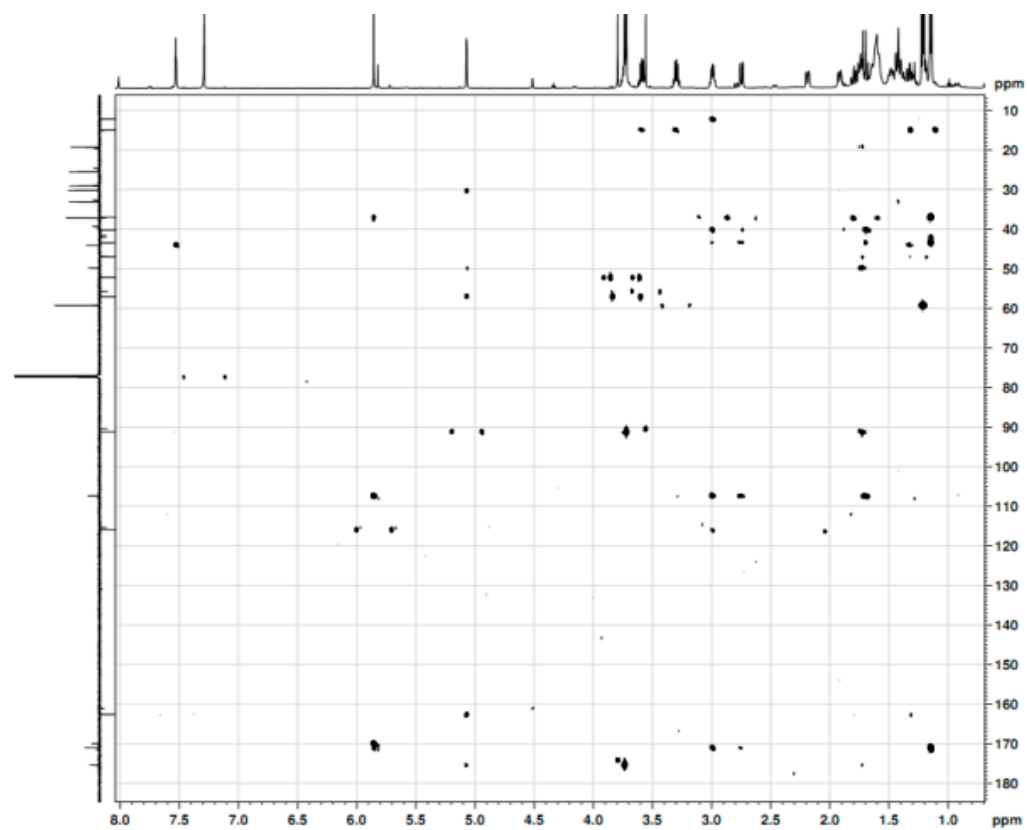

Figure S5.  $^1\text{H}$ - $^1\text{H}$  COSY spectrum of the new compound **1**

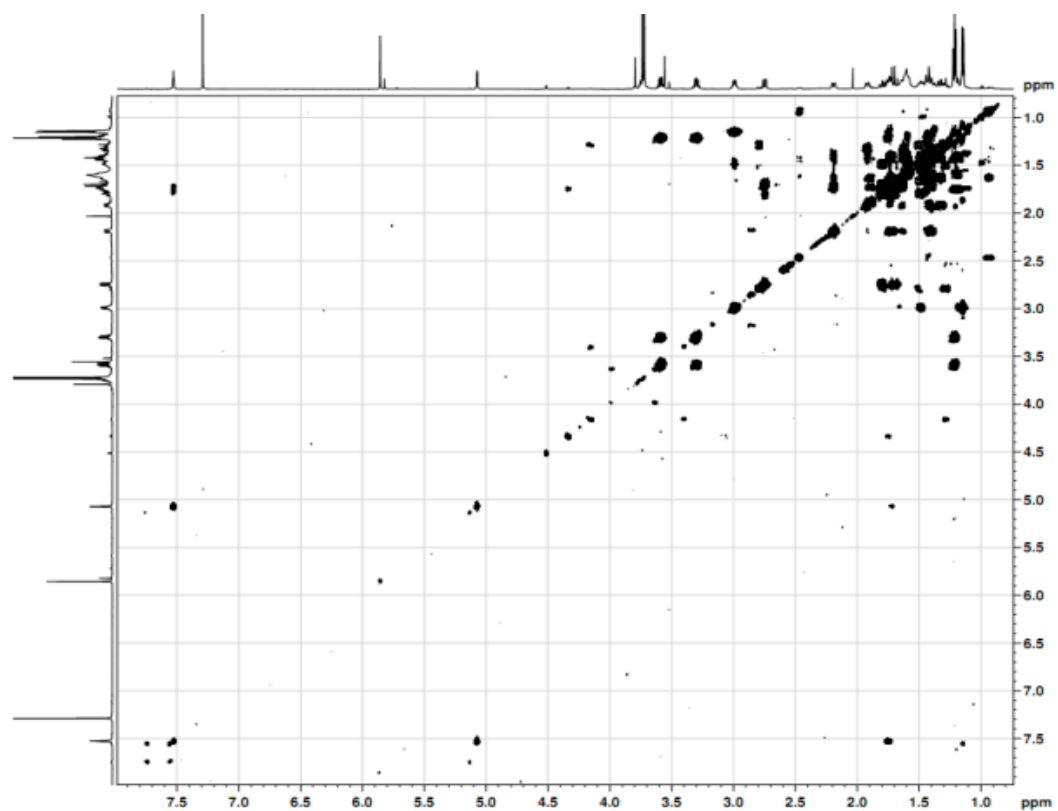

Figure S6. NOESY spectrum of the new compound **1**

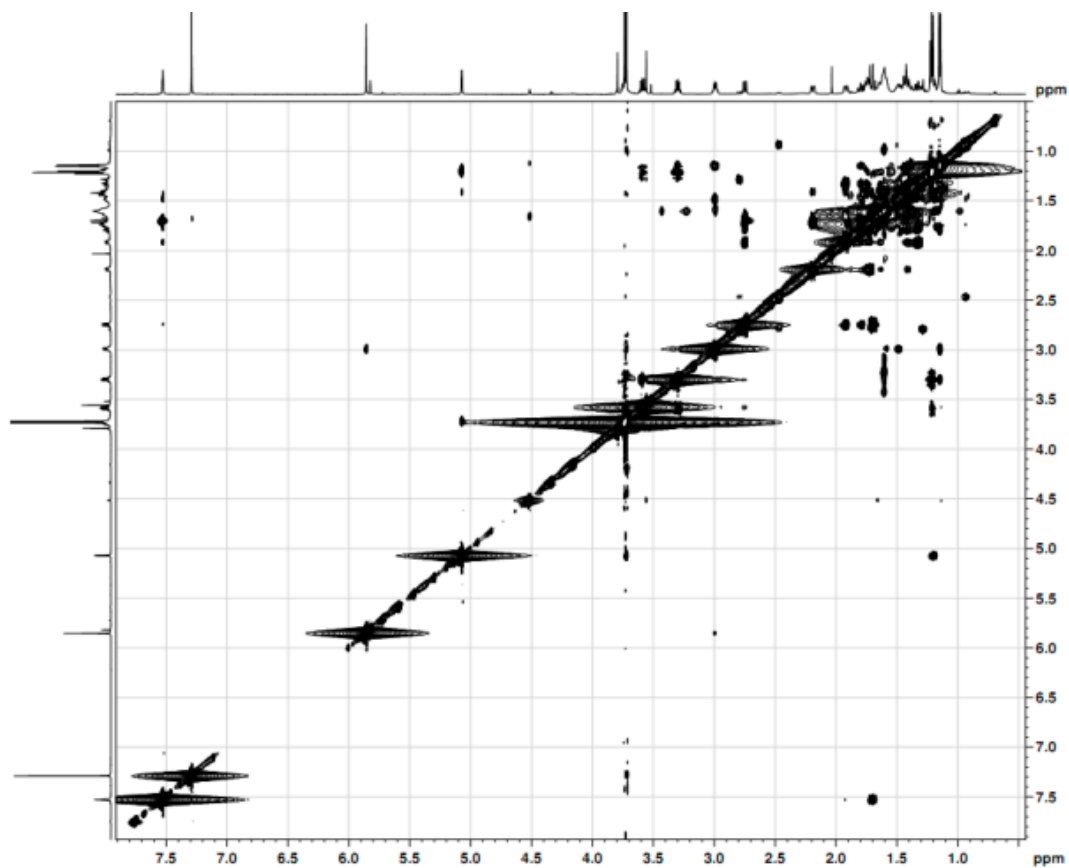

Figure S7.  $^1\text{H}$ -NMR (600 MHz,  $\text{CDCl}_3$ ) spectrum of the new compound **2**

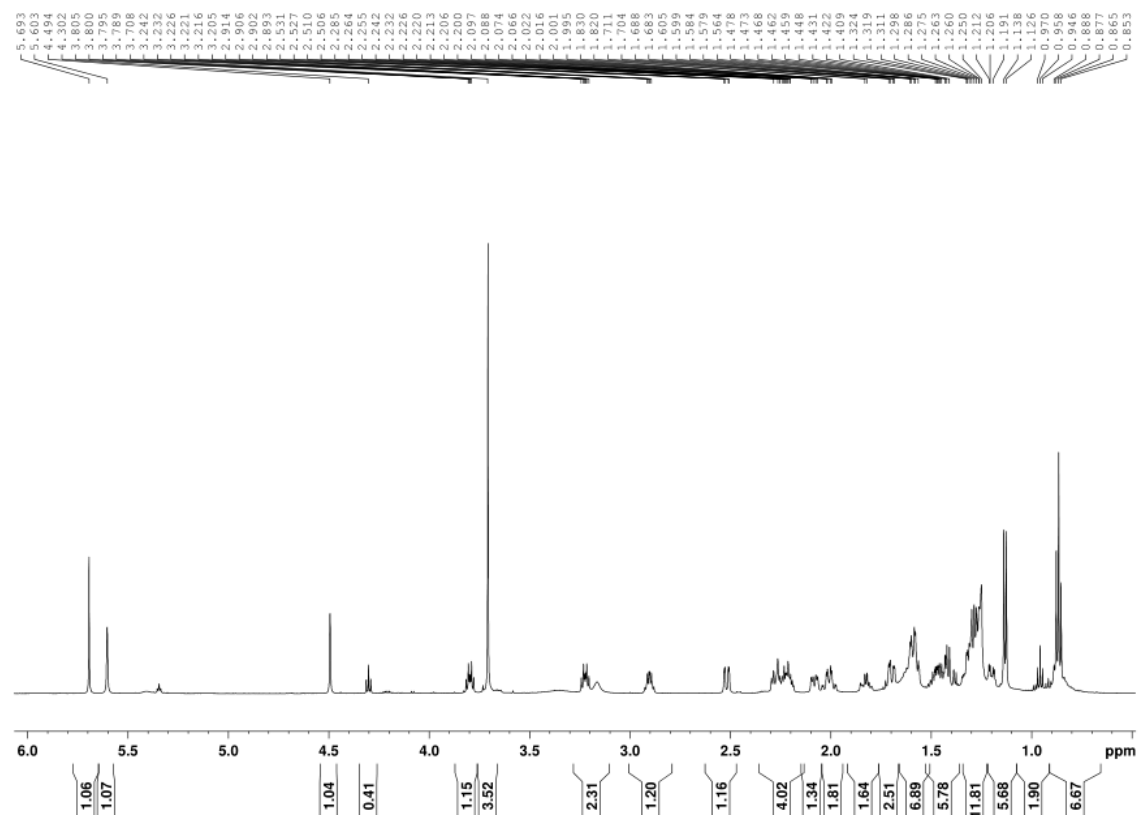

Figure S8.  $^{13}\text{C}$ -APT (150 MHz,  $\text{CDCl}_3$ ) spectrum of the new compound **2**

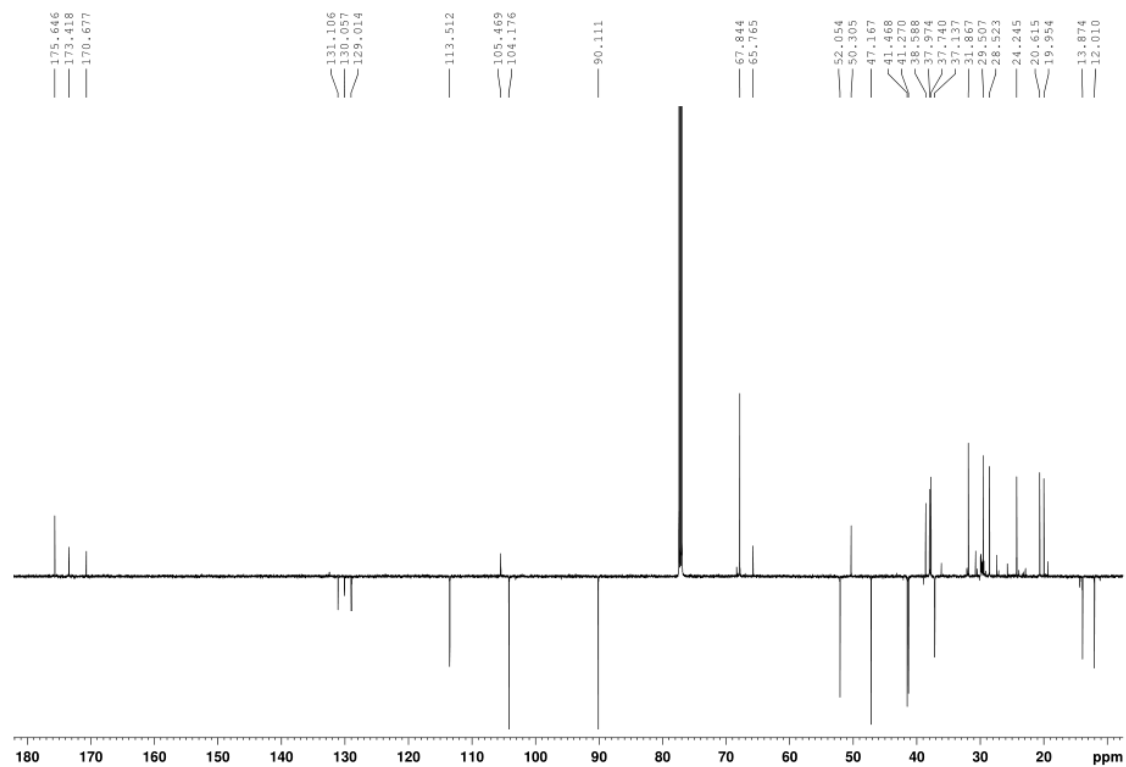

Figure S9. HSQC spectrum of the new compound **2**

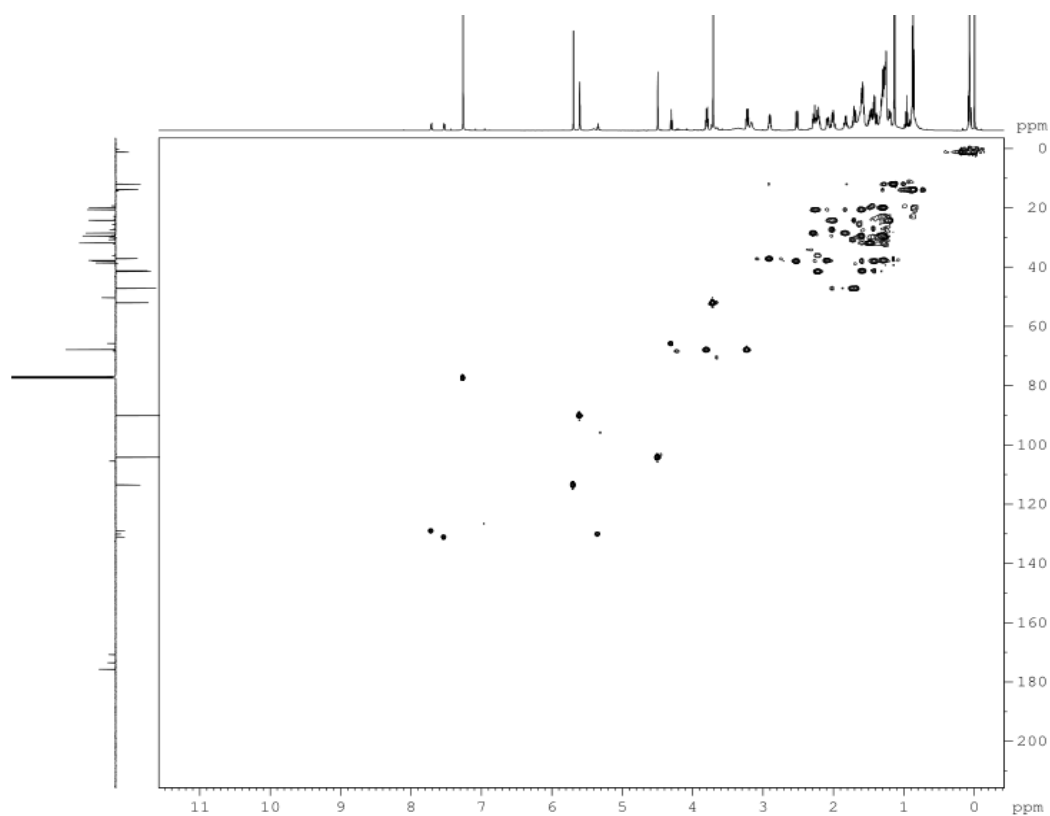

Figure S10. HMBC spectrum of the new compound **2**

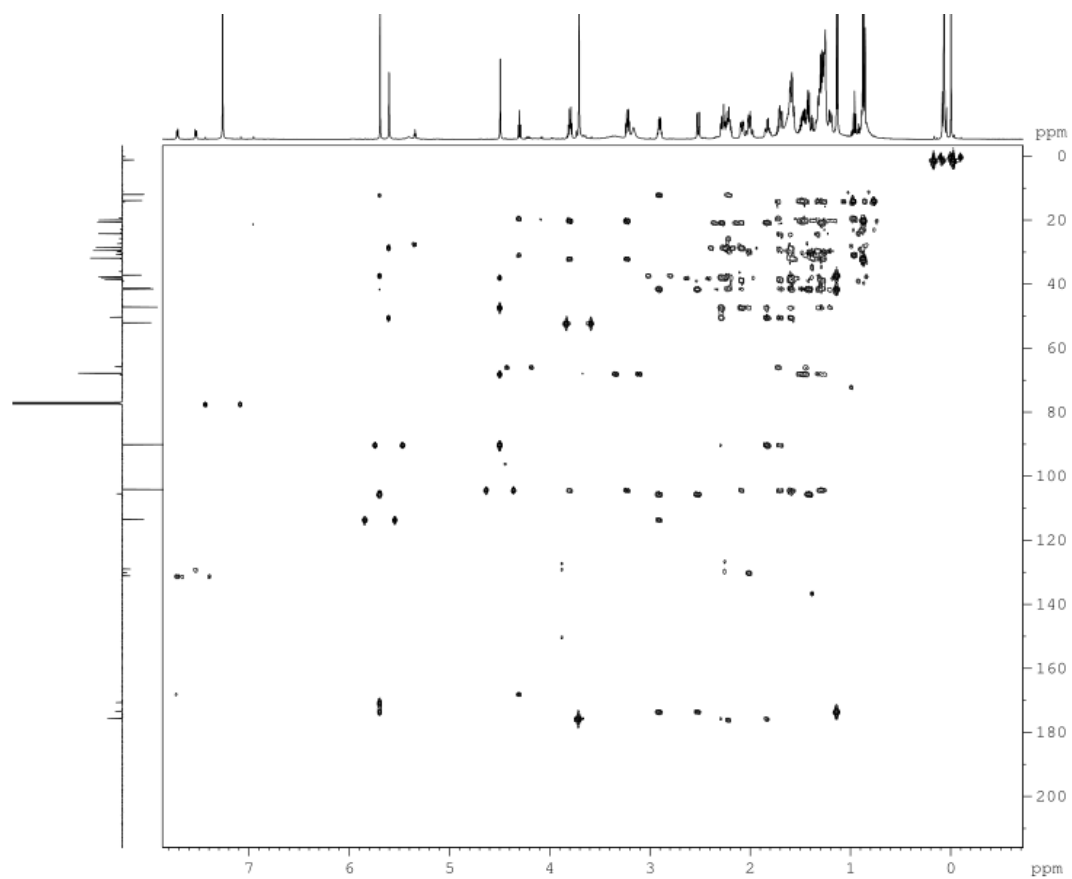



Figure S11.  $^1\text{H}$ - $^1\text{H}$  COSY spectrum of the new compound **2**

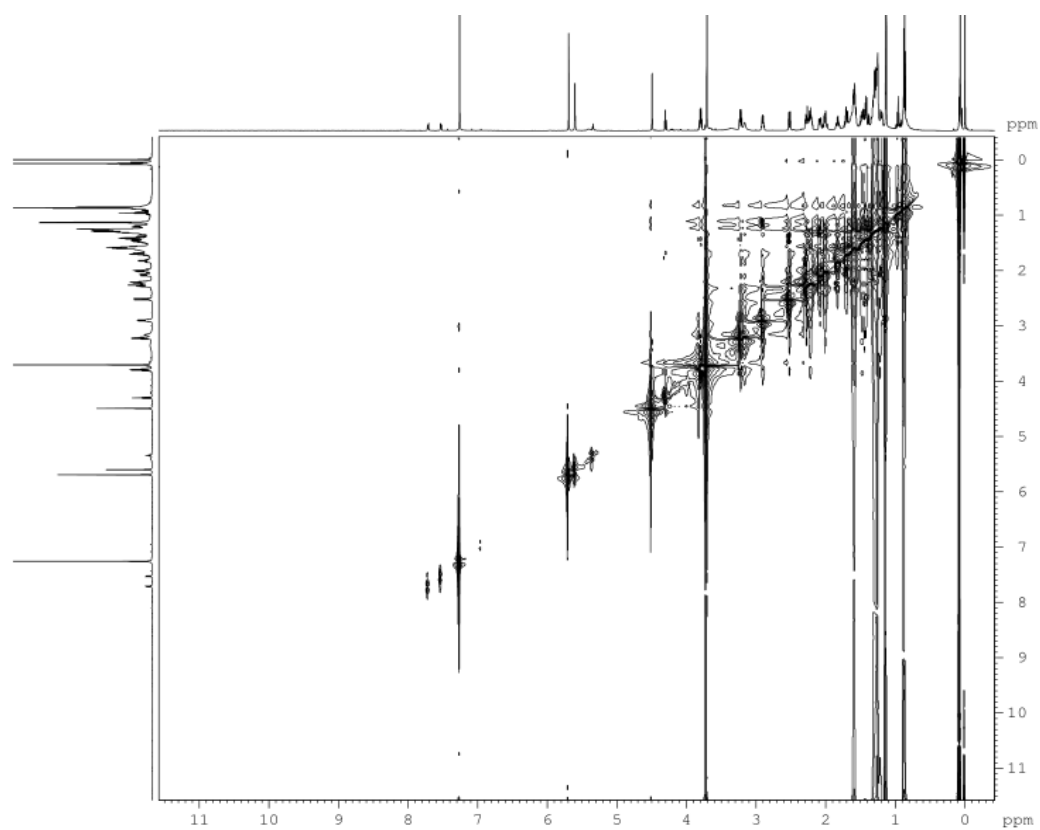

Figure S12. NOESY spectrum of the new compound **2**

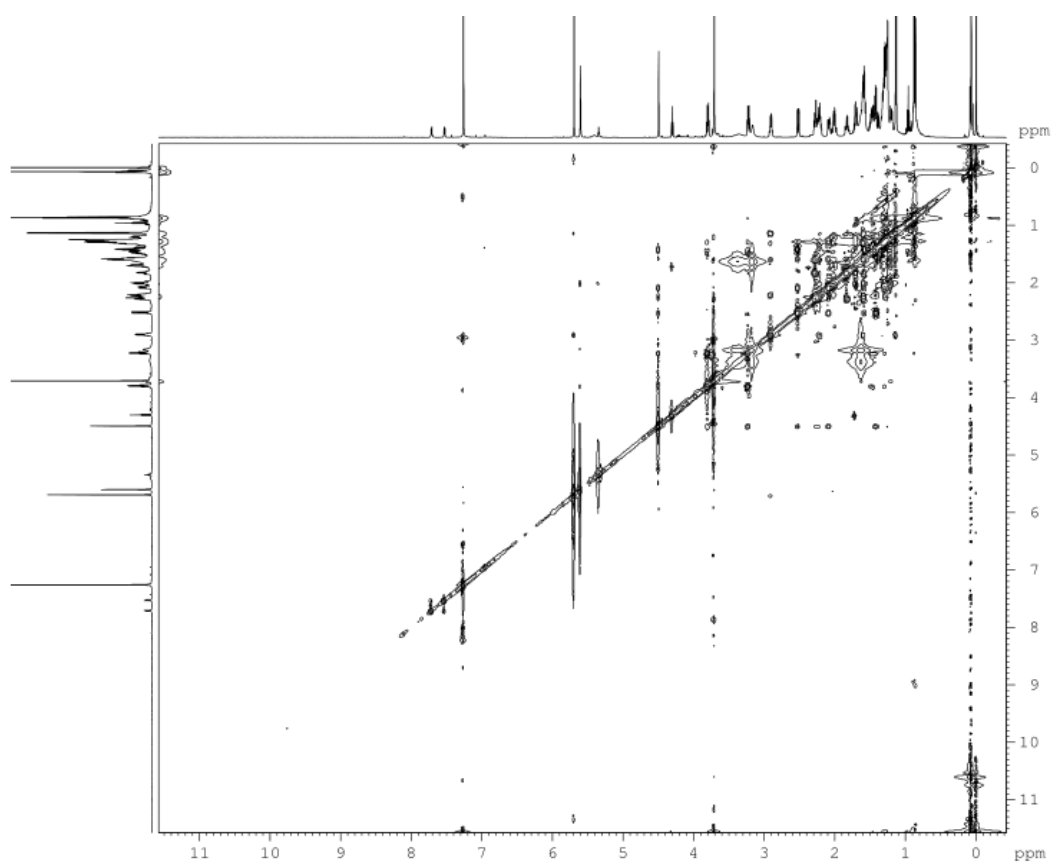

Supplement: Supplementary file 1 [file supplementary]
